# Supplementary material
Source: PubMed Central journal article supplement (PMC6699930)
Supplement: NIHMS1522070-supplement-1.pdf [file NIHMS1522070-supplement-1.pdf]

## Gender Trends in Authorship in Psychiatry Journals From 2008-2018

### *Supplemental Information*

#### **Contents:**

Figure S1

Figure S2

Figure S3

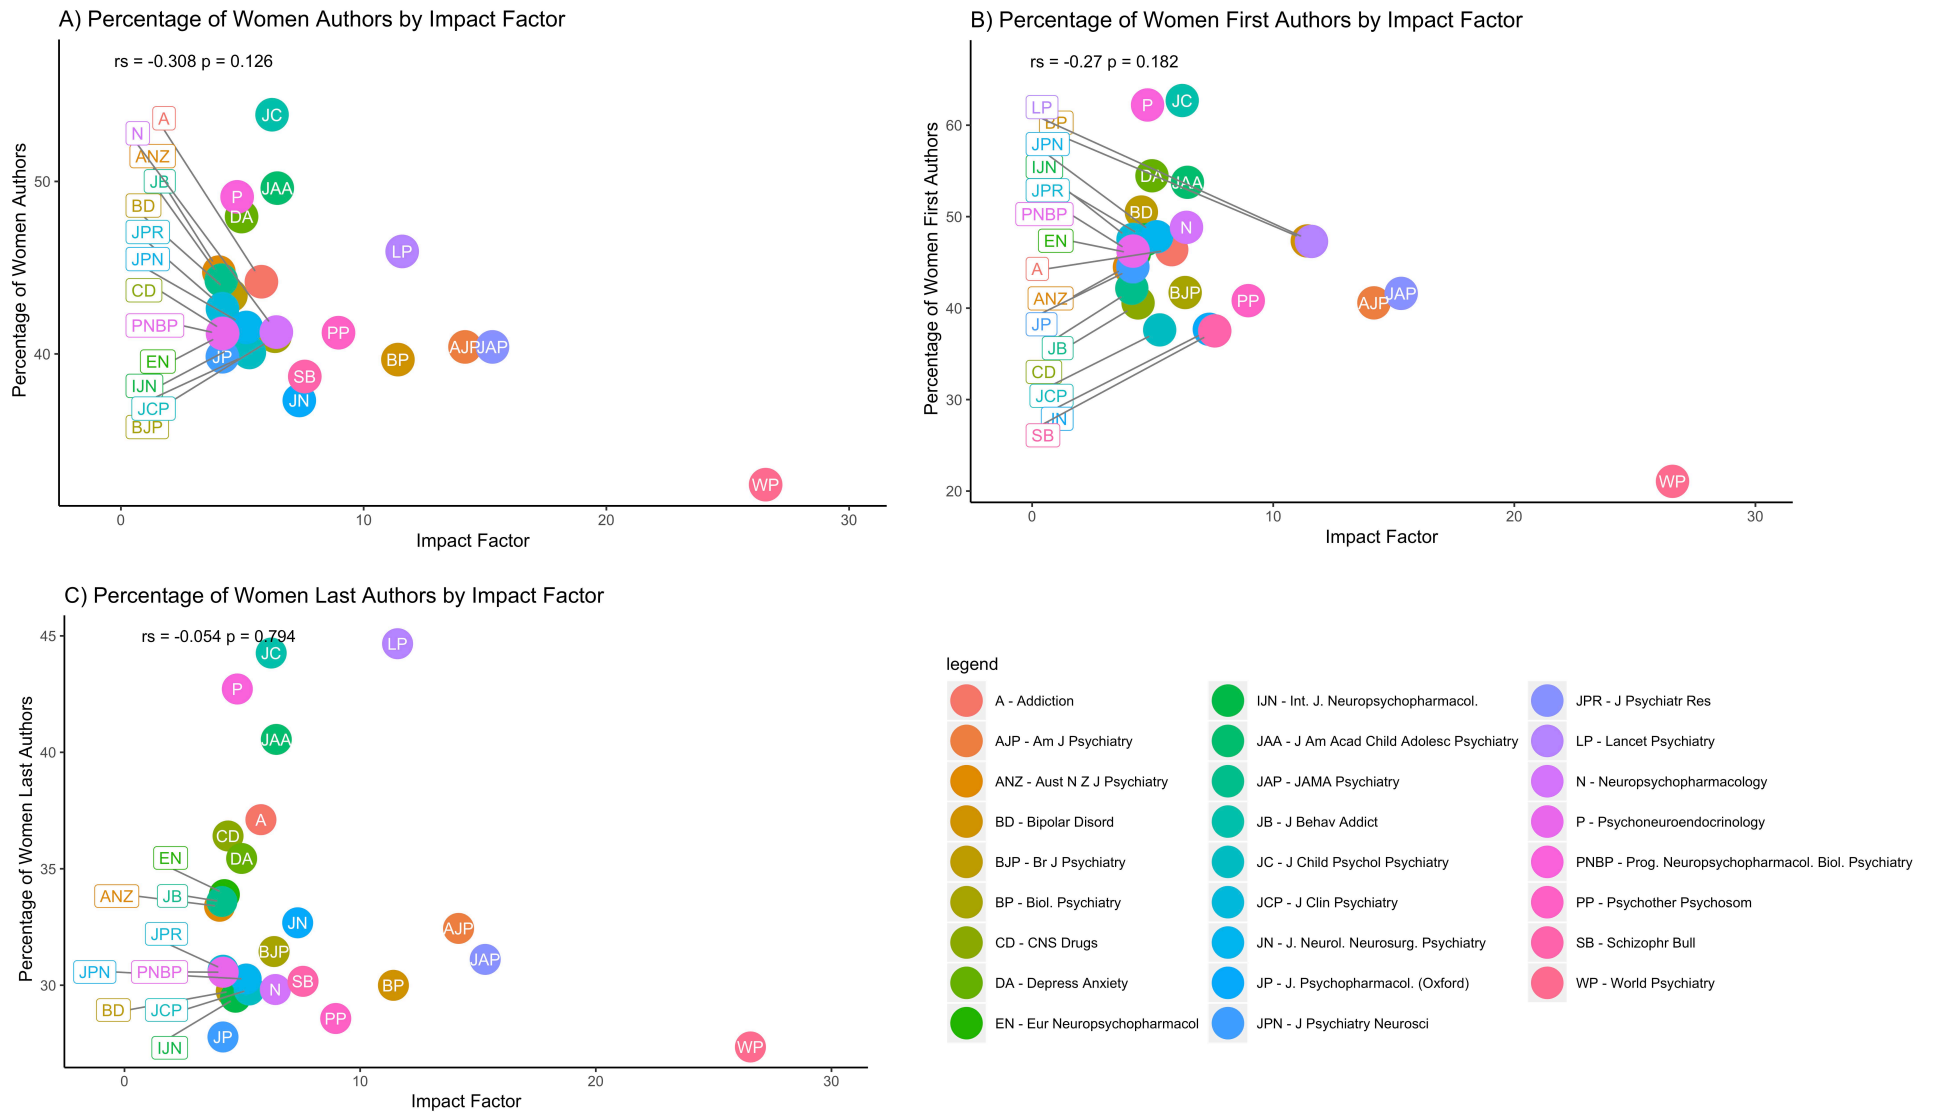

Figure S1: Correlation between Author Gender Representation and Impact Factor in Journals with Greater than 50% of Authors with a Gender Identified

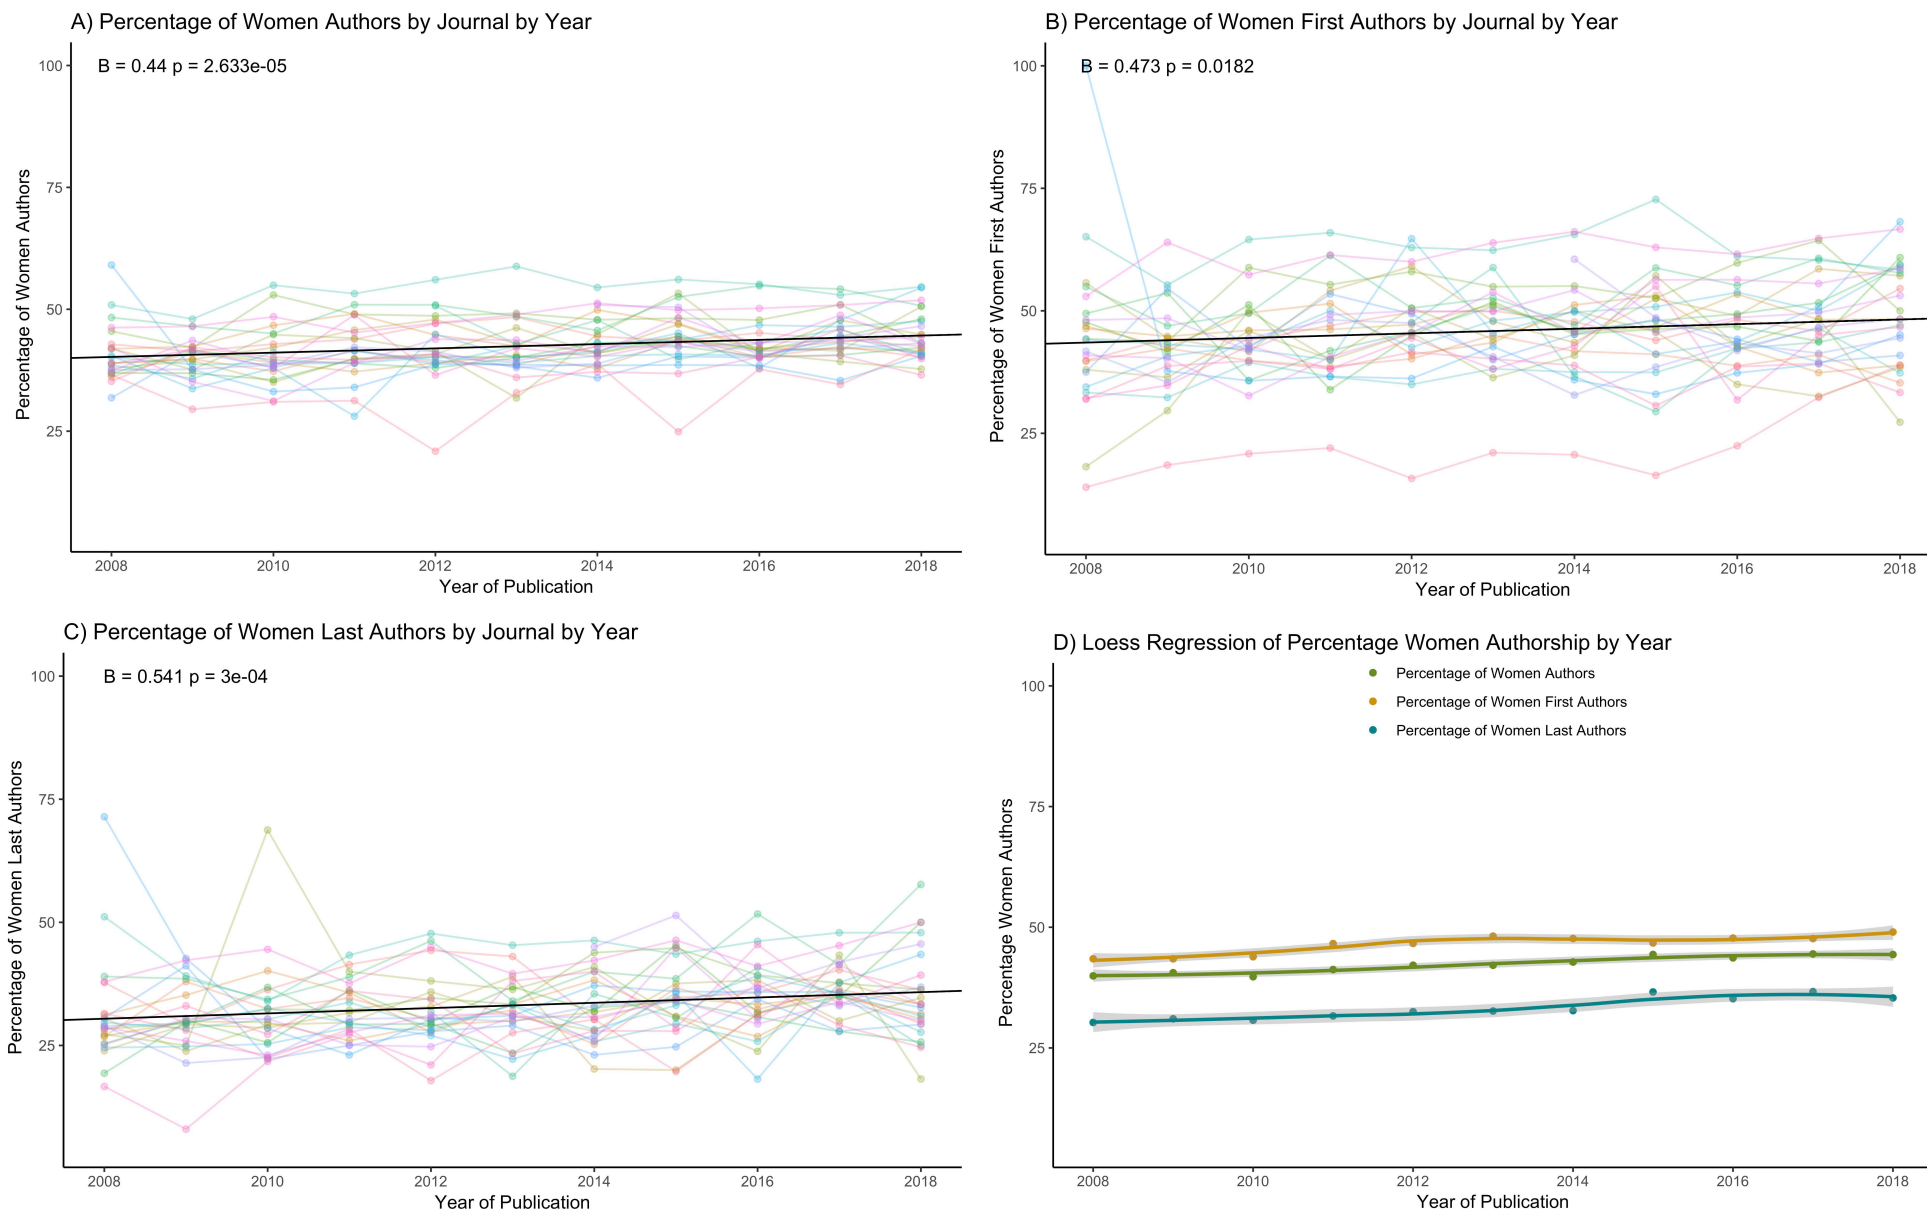

Figure S2: Temporal Trends in Author Gender Representation in Journals with Greater than 50% of Authors with a Gender Identified

A) Percentage of Women Authors by Journal by Year

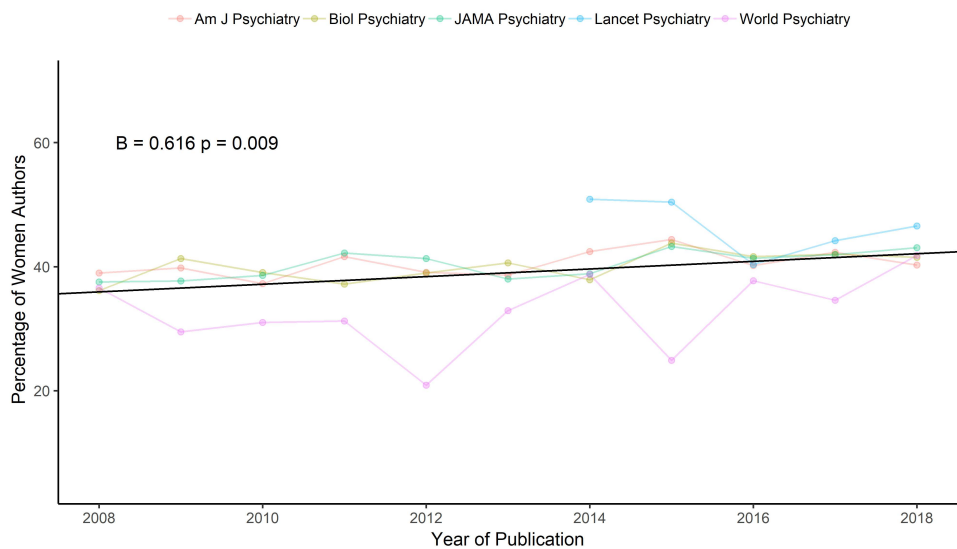

B) Percentage of Women First Authors by Journal by Year

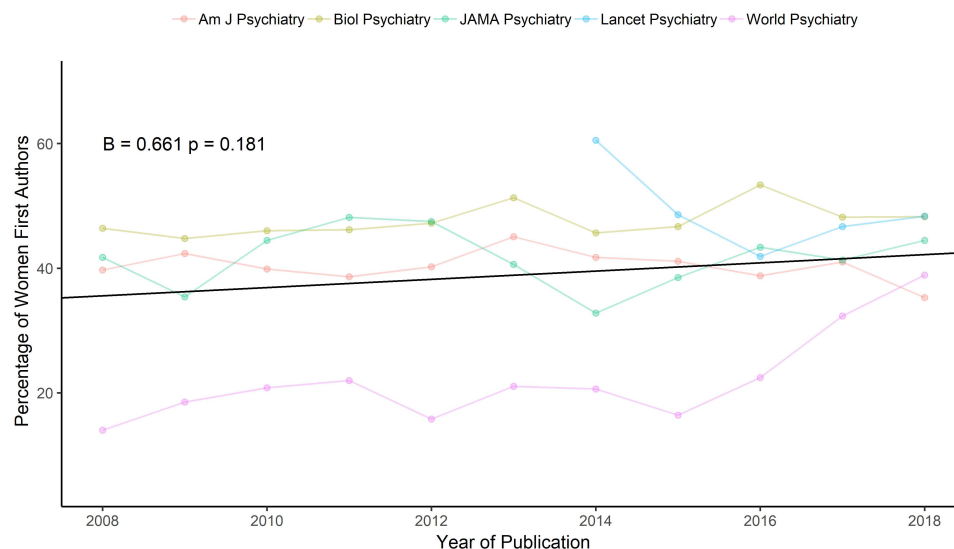

C) Proportion of Women Last Authors by Journal by Year

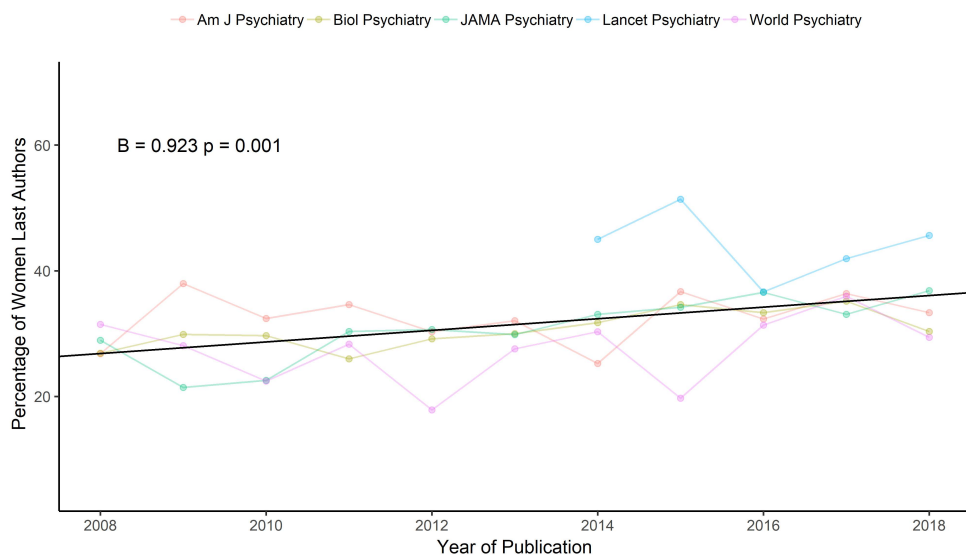

D) Loess Regression of Percentage Women Authorship by Year

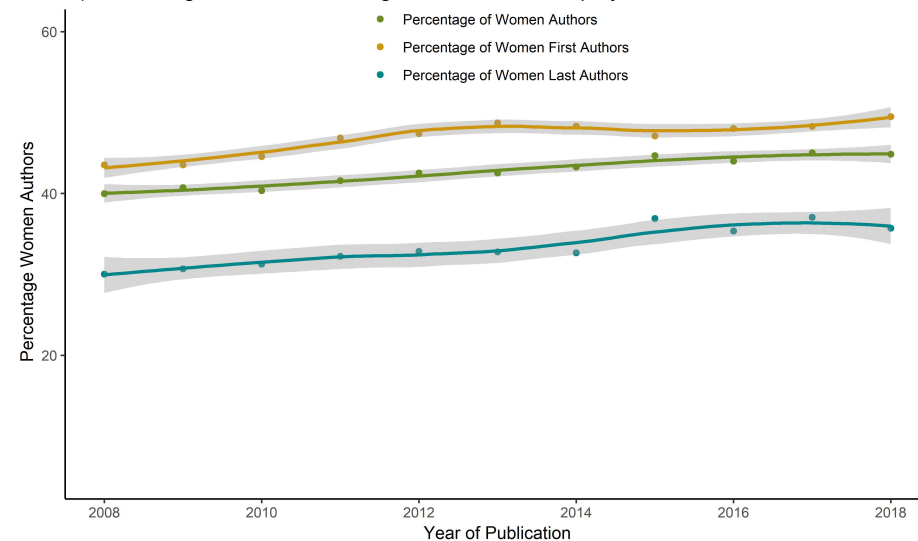

Figure S3: Temporal Trends in Author Gender Representation (2008-2018) in the Five Psychiatry Journals with the Highest Impact Factor
